# Supplementary material for: Lignin-Derived Syringol and Acetosyringone from Palm Bunch Using Heterogeneous Oxidative Depolymerization over Mixed Metal Oxide Catalysts under Microwave Heating
Source: MDPI journal article supplement (doi:10.3390/molecules26247444), 2021-12-08
Supplement: s1 [file s1]

## Supporting Information

### **Lignin-Derived Syringol and Acetosyringone from Palm Bunch Using Heterogeneous Oxidative Depolymerization over Mixed Metal Oxide Catalysts Under Microwave Heating**

Rangsalid Panyadee <sup>1</sup>, Aphinan Saengsrichan <sup>1</sup>, Pattaraporn Posoknistakul <sup>1</sup>, Navadol Laosiripojana <sup>2</sup>, Sakhon Ratchahat <sup>1</sup>, Babasaheb M. Matsagar <sup>3</sup>, Kevin C.-W. Wu <sup>3,4,5</sup> and Chularat Sakdaronnarong <sup>1,\*</sup>

- <sup>1</sup> Department of Chemical Engineering, Faculty of Engineering, Mahidol University, 999 Putthamonthon 4 Road, Salaya, Putthamonthon, Nakorn Pathom 73170, Thailand; [rangsalid.p@gmail.com](mailto:rangsalid.p@gmail.com) (R.P.); [aphinan.sae@student.mahidol.edu](mailto:aphinan.sae@student.mahidol.edu) (A.S.); [pattaraporn.pos@mahidol.edu](mailto:pattaraporn.pos@mahidol.edu) (P.P.); [sakhon.rat@mahidol.edu](mailto:sakhon.rat@mahidol.edu) (S.R.); [chularat.sak@mahidol.ac.th](mailto:chularat.sak@mahidol.ac.th) (C.S.)
- <sup>2</sup> The Joint Graduate School of Energy and Environment (JGSEE), King Mongkut's University of Technology Thonburi, 126 Pracha Uthit Road, Bang Mot, Tungkru, Bangkok 10140, Thailand; [navadol@jgsee.kmutt.ac.th](mailto:navadol@jgsee.kmutt.ac.th)
- <sup>3</sup> Department of Chemical Engineering, National Taiwan University, No.1, Sec.4 Roosevelt Road, Taipei City 10617, Taiwan; [bmatsagar22@gmail.com](mailto:bmatsagar22@gmail.com) (B.M.M.); [kevinwu@ntu.edu.tw](mailto:kevinwu@ntu.edu.tw) (K.C.-W.W.)
- <sup>4</sup> Center of Atomic Initiative for New Materials (AI-MAT), National Taiwan University, Taipei City 10617, Taiwan
- <sup>5</sup> International Graduate Program of Molecular Science and Technology, National Taiwan University (NTU), Taipei City 10617, Taiwan
- \* Correspondence: [chularat.sak@mahidol.ac.th](mailto:chularat.sak@mahidol.ac.th)

Table S1 Acidity of synthesized catalysts from NH<sub>3</sub>-TPD analysis.

| Catalysts                            | Total acid site density (mmol g <sup>-1</sup> ) |
|--------------------------------------|-------------------------------------------------|
| Cu-Fe/Al <sub>2</sub> O <sub>3</sub> | 0.384                                           |
| Al <sub>2</sub> O <sub>3</sub>       | 0.534                                           |
| Cu-Fe/SiO <sub>2</sub>               | 0.251                                           |
| SiO <sub>2</sub>                     | 0.967                                           |

(a) Cu-Fe/Al<sub>2</sub>O<sub>3</sub>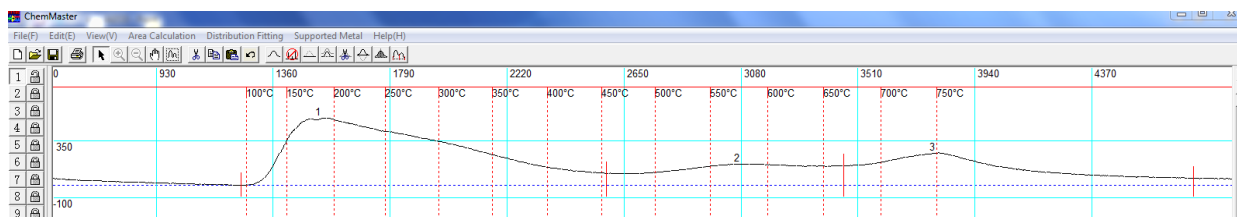(b) Al<sub>2</sub>O<sub>3</sub>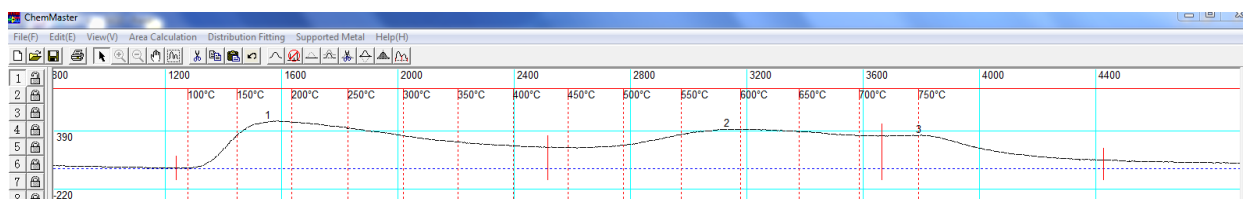(c) Cu-Fe/SiO<sub>2</sub>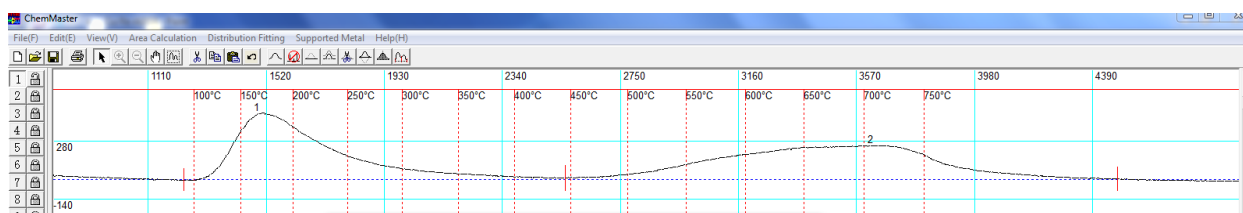(d) SiO<sub>2</sub>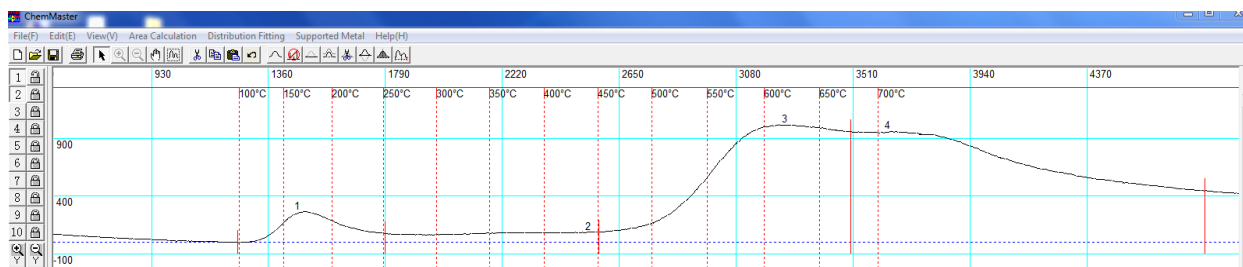Figure S1 NH<sub>3</sub>-TPD chromatograms of synthesized catalysts and supports of (a) Cu-Fe/Al<sub>2</sub>O<sub>3</sub>,(b) Al<sub>2</sub>O<sub>3</sub>, (c) Cu-Fe/SiO<sub>2</sub>, (d) SiO<sub>2</sub>.

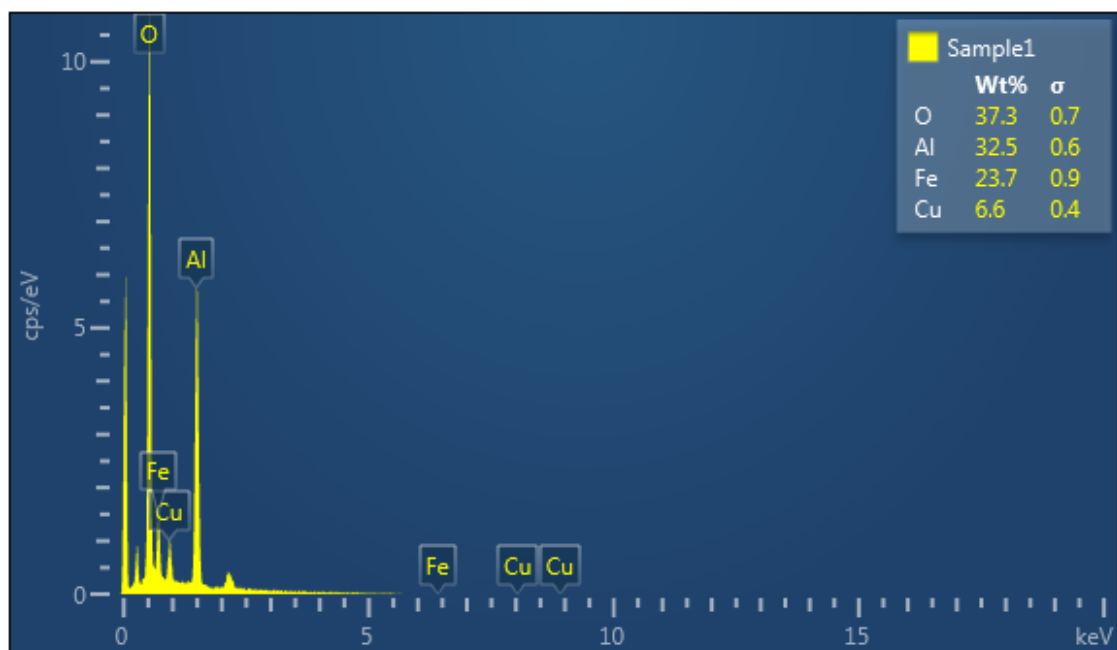

Figure S2 The elemental composition of Cu-Fe/Al<sub>2</sub>O<sub>3</sub> mixed metal oxide catalyst from EDX analysis.

Table S2 The type of element from EDX analysis of Cu-Fe/Al<sub>2</sub>O<sub>3</sub> catalyst

| Element | Line Type | Apparent Concentration | k Ratio | wt%    | wt% Sigma | Oxide                          | Oxide % | Standard Label                 |
|---------|-----------|------------------------|---------|--------|-----------|--------------------------------|---------|--------------------------------|
| O       | -         | -                      | -       | 37.31  | -         | -                              | -       | -                              |
| Al      | K series  | 14.84                  | 0.10656 | 32.46  | 0.57      | Al <sub>2</sub> O <sub>3</sub> | 61.34   | Al <sub>2</sub> O <sub>3</sub> |
| Fe      | L series  | 6.17                   | 0.06166 | 23.66  | 0.92      | FeO                            | 30.44   | Fe                             |
| Cu      | L series  | 1.56                   | 0.01563 | 6.57   | 0.37      | CuO                            | 8.22    | Cu                             |
| Total:  | -         | -                      | -       | 100.00 | -         | -                              | 100.00  | -                              |

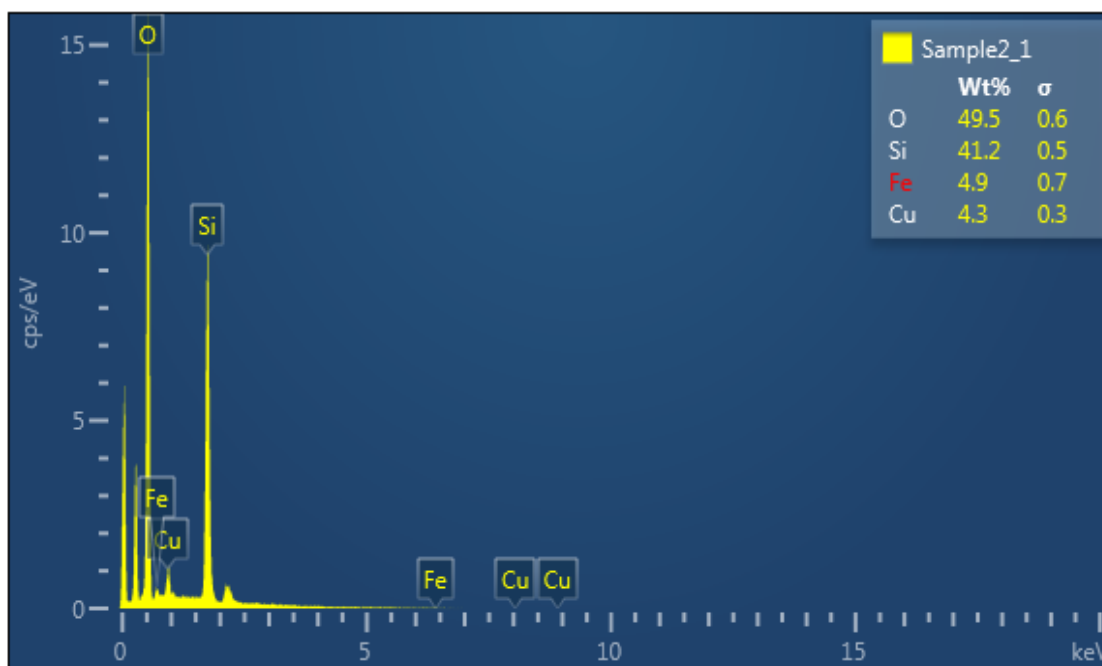

Figure S3 The elemental composition of Cu-Fe/SiO<sub>2</sub> mixed metal oxide catalyst from EDX analysis.

Table S3 The type of element from EDX analysis of Cu-Fe/SiO<sub>2</sub> catalyst

| Element | Line Type | Apparent Concentration | k Ratio | Wt%    | Wt% Sigma | Oxide            | Oxide % | Standard Label   |
|---------|-----------|------------------------|---------|--------|-----------|------------------|---------|------------------|
| O       |           |                        |         | 49.49  |           |                  |         |                  |
| Si      | K series  | 20.90                  | 0.16557 | 41.25  | 0.50      | SiO <sub>2</sub> | 88.24   | SiO <sub>2</sub> |
| Fe      | L series  | 1.28                   | 0.01281 | 4.91   | 0.71      | FeO              | 6.31    | Fe               |
| Cu      | L series  | 1.23                   | 0.01232 | 4.35   | 0.28      | CuO              | 5.44    | Cu               |
| Total:  |           |                        |         | 100.00 |           |                  | 100.00  |                  |

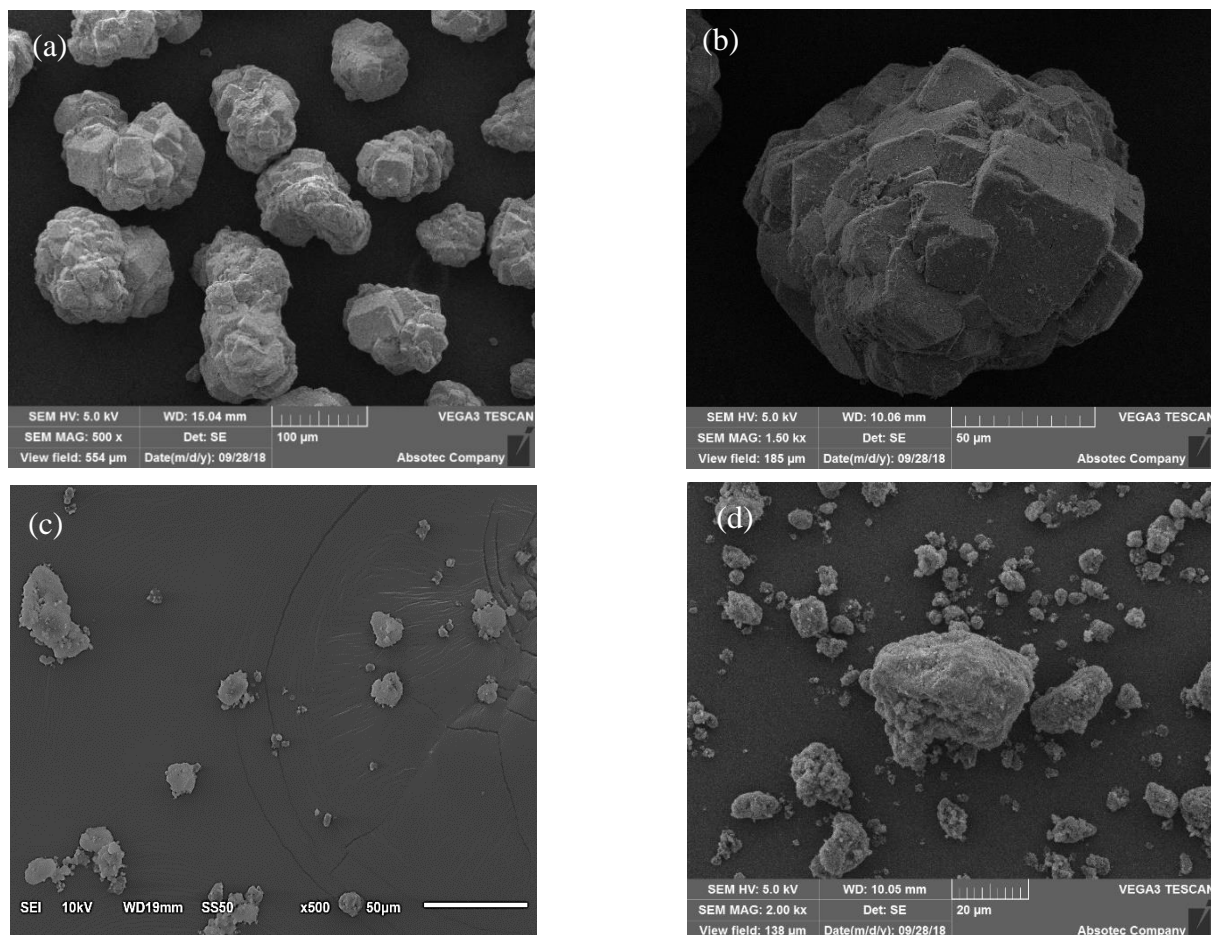

Figure S4 Morphological of heterogeneous bimetallic and metal organic framework catalysts (a) Cu-Fe/Al<sub>2</sub>O<sub>3</sub> at  $\times 500$  magnification (b) Cu-Fe/Al<sub>2</sub>O<sub>3</sub>  $\times 1000$  magnification (c) Cu-Fe/SiO<sub>2</sub> at  $\times 500$  magnification, and (d) Cu-Fe/SiO<sub>2</sub> at  $\times 2000$  magnification.



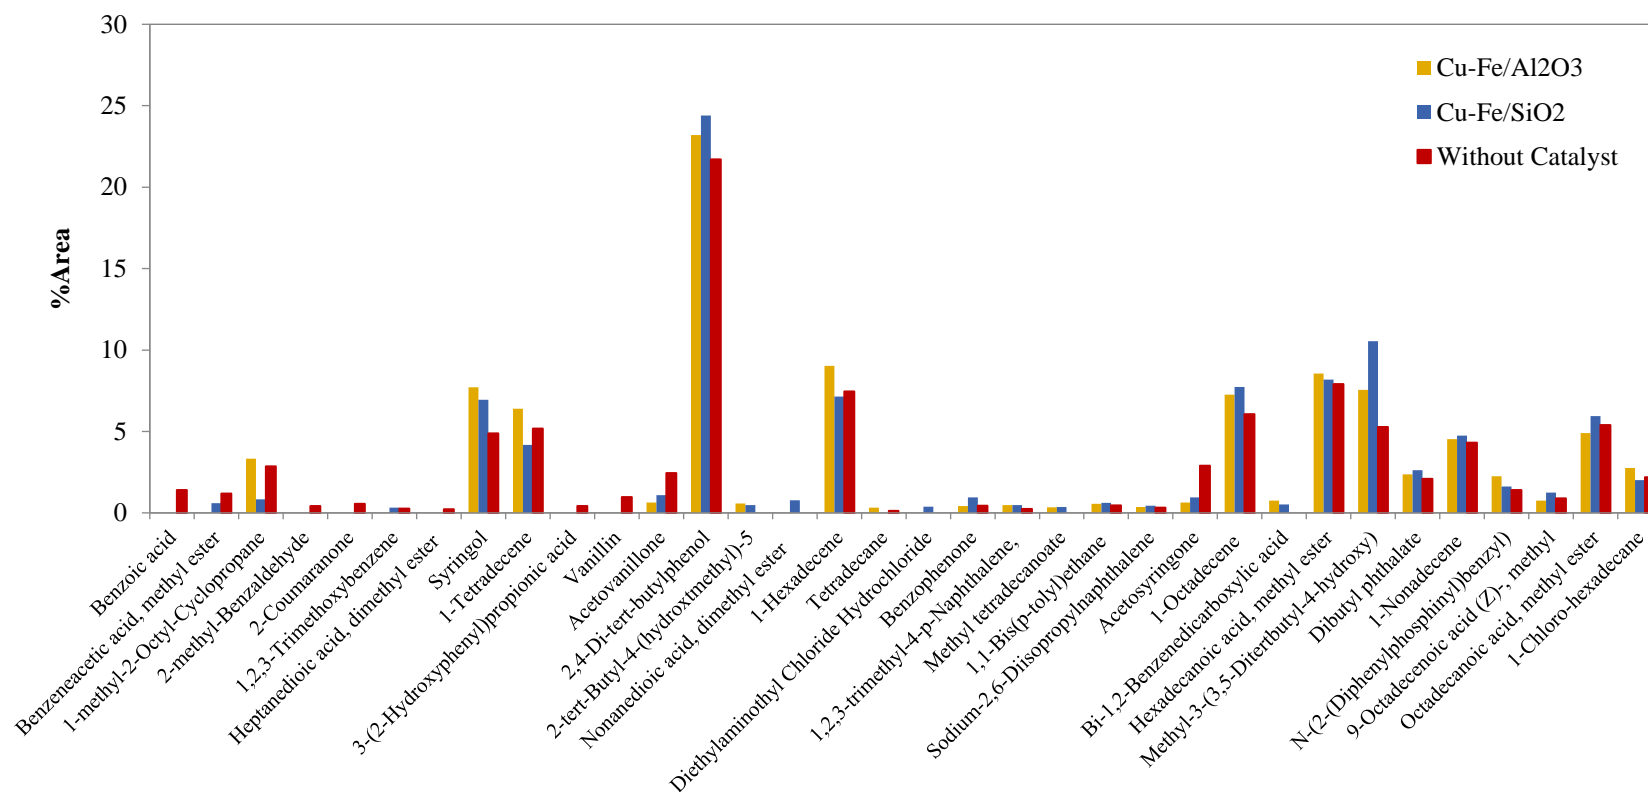

Figure S5 The phenolic compounds concentration peak area from GC-MS analysis for  $K_2CO_3$ -lignin depolymerization with Cu-Fe/ $Al_2O_3$ , Cu-Fe/ $SiO_2$ , and without catalyst (Microwave heating at 300 watts, 1% w/w of  $H_2O_2$  in NaOH solution for 15 min)

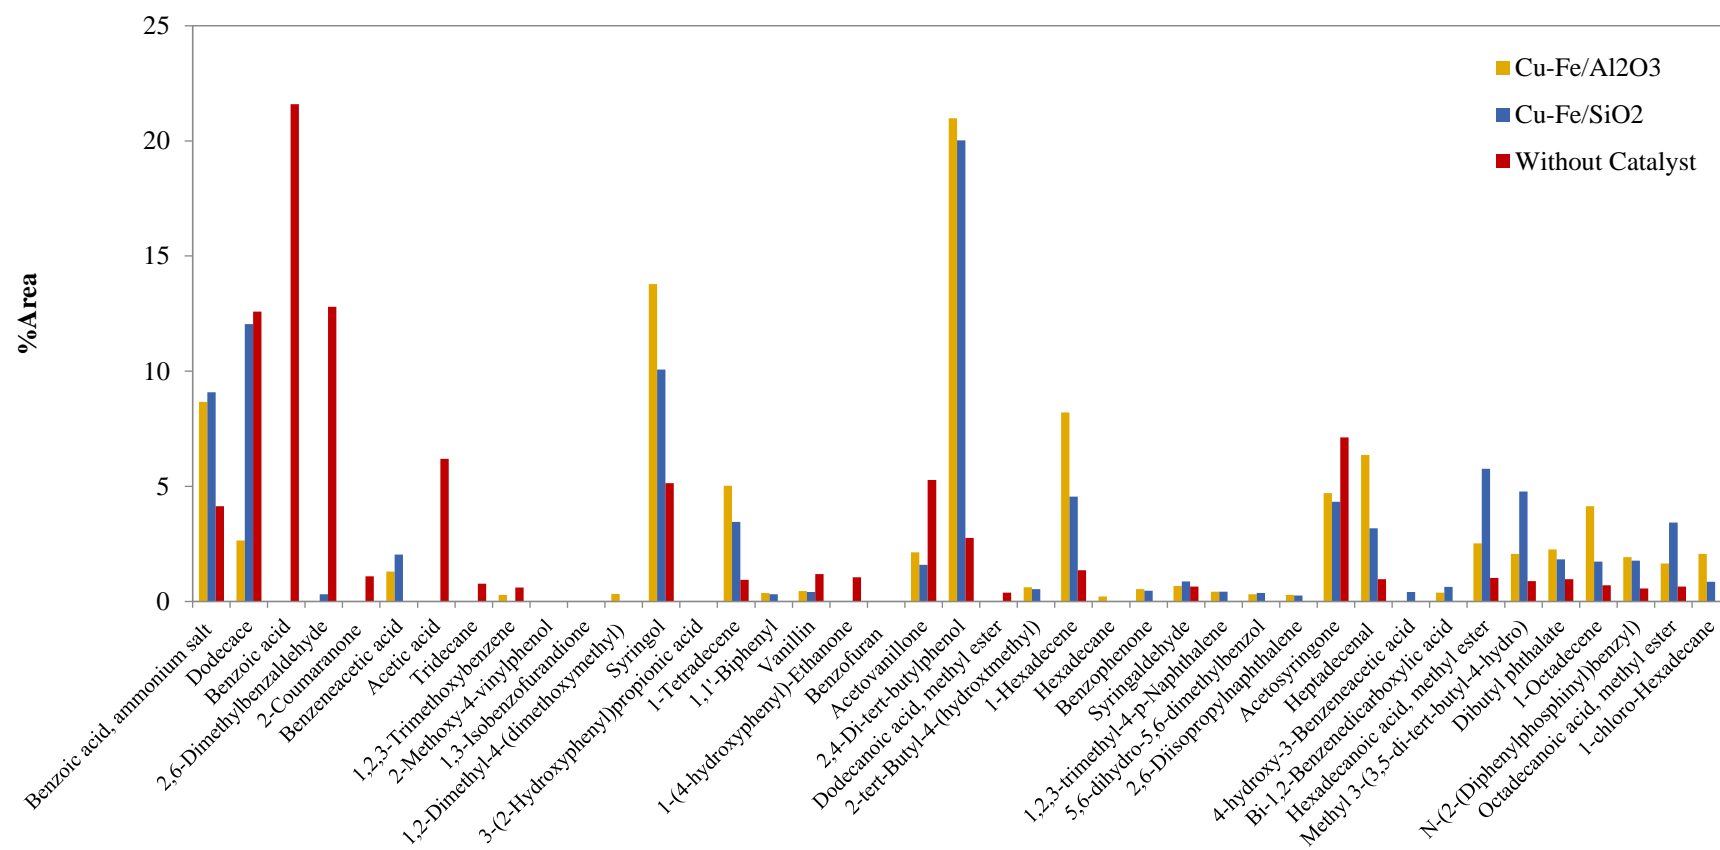

Figure S6 The phenolic compounds concentration peak area from GC-MS analysis for  $K_2CO_3$ -lignin depolymerization with Cu-Fe/ $Al_2O_3$ , Cu-Fe/ $SiO_2$ , and without catalyst (microwave heating at 300 watts, 1%w/w of  $H_2O_2$  in NaOH solution for 30 min).

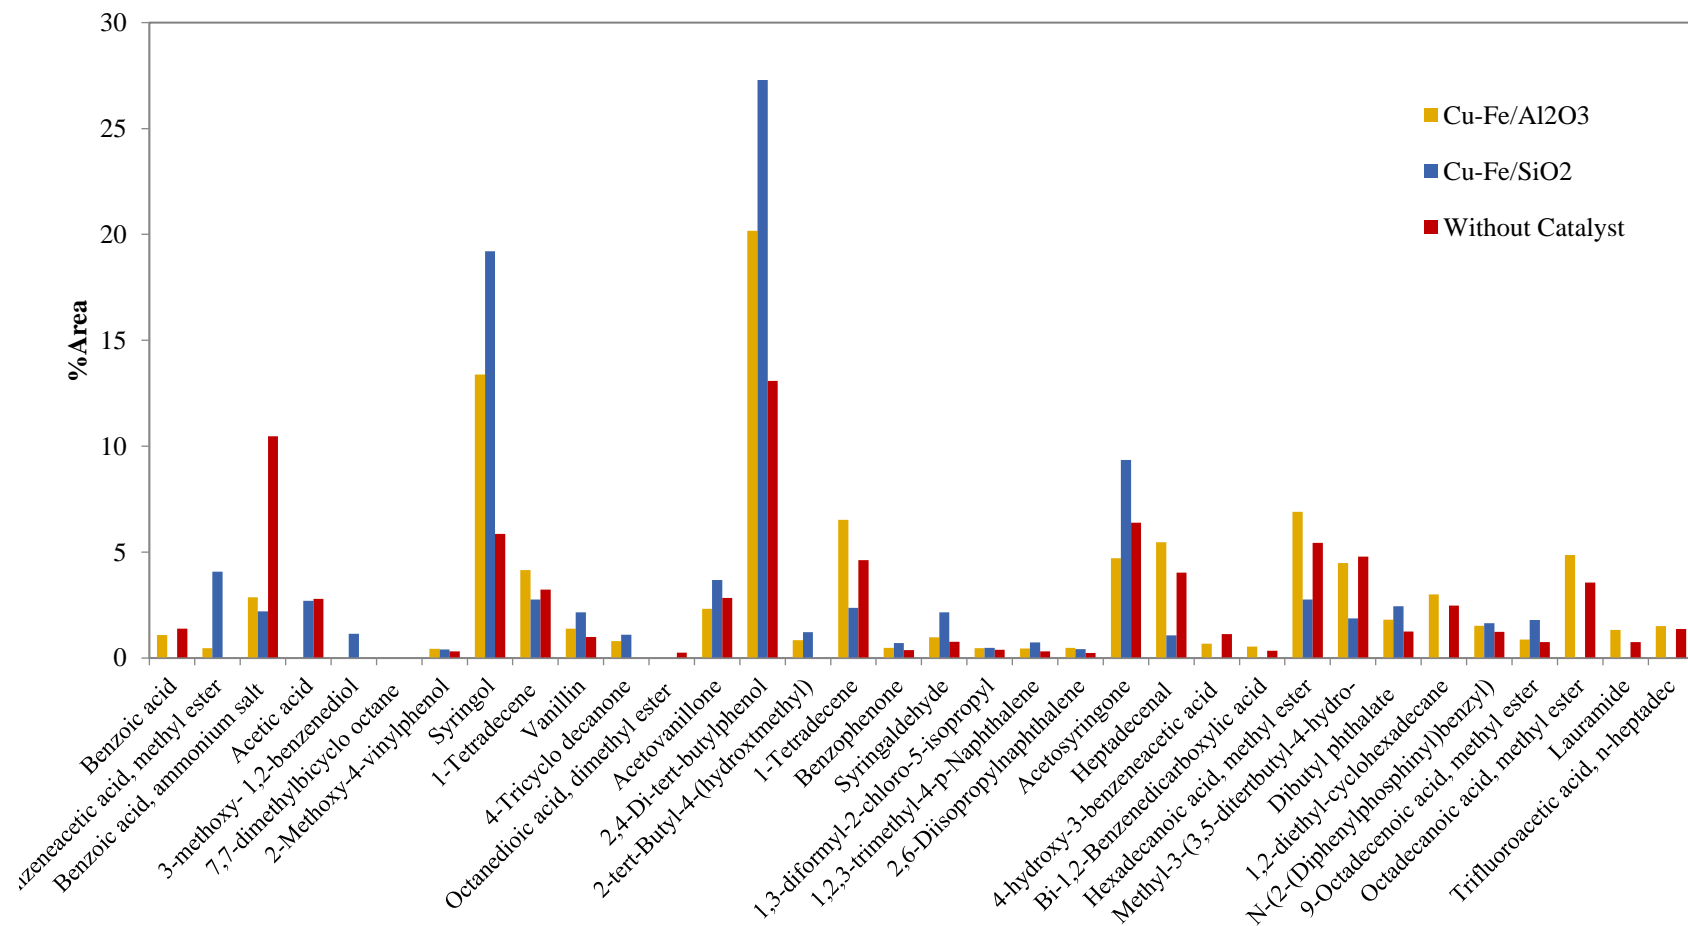

Figure S7 The phenolic compounds concentration peak area from GC-MS analysis for NaOH-lignin depolymerization with Cu-Fe/Al<sub>2</sub>O<sub>3</sub>, Cu-Fe/SiO<sub>2</sub>, and without catalyst (microwave heating at 300 watts, 1% w/w of H<sub>2</sub>O<sub>2</sub> in NaOH solution for 15 min).

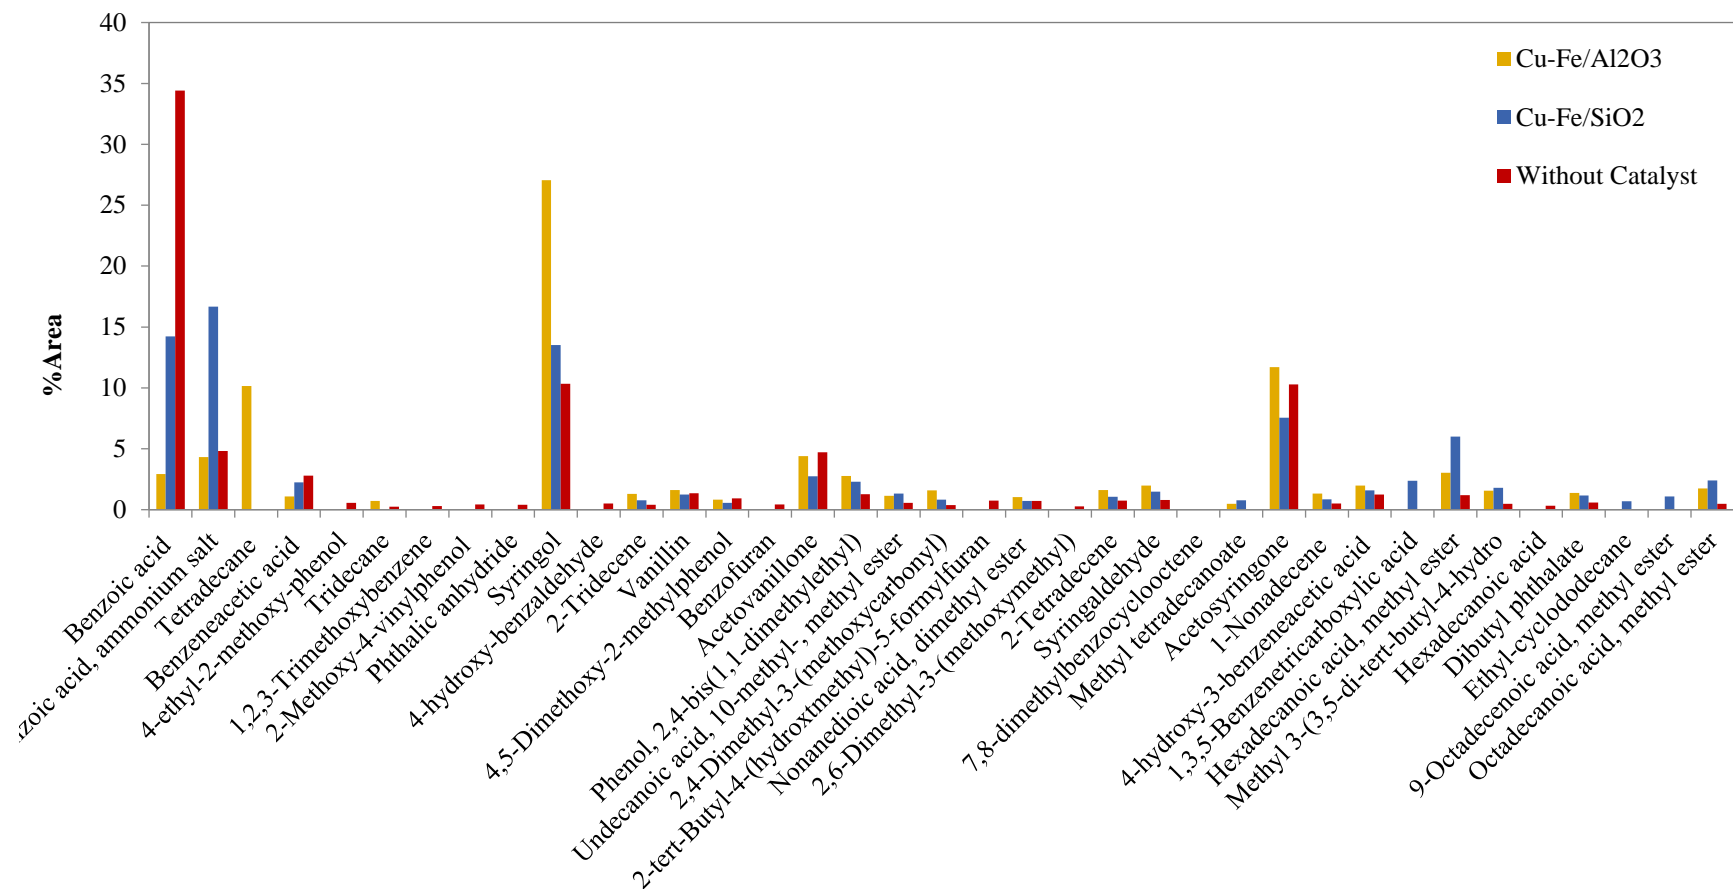

Figure S8 The phenolic compounds concentration peak area from GC-MS analysis for NaOH-lignin depolymerization with Cu-Fe/Al<sub>2</sub>O<sub>3</sub>, Cu-Fe/SiO<sub>2</sub>, and without catalyst (microwave heating at 300 watts, 1% w/w of H<sub>2</sub>O<sub>2</sub> in NaOH solution for 30 min).

Table S4 The phenolic compounds peak area percentage from GC-MS analysis for K<sub>2</sub>CO<sub>3</sub>-lignin depolymerization with Cu-Fe/Al<sub>2</sub>O<sub>3</sub>, Cu-Fe/SiO<sub>2</sub>, and without catalyst (microwave heating at 300 watts, 1% w/w of H<sub>2</sub>O<sub>2</sub> in NaOH solution for 15 min)

| Cu-Fe/Al <sub>2</sub> O <sub>3</sub> |       |                                         | Cu-Fe/SiO <sub>2</sub> |       |                                         | No catalyst |       |                                    |
|--------------------------------------|-------|-----------------------------------------|------------------------|-------|-----------------------------------------|-------------|-------|------------------------------------|
| RT                                   | %Area | Type                                    | RT                     | %Area | Type                                    | RT          | %Area | Type                               |
|                                      |       | Benzoic acid                            |                        |       |                                         | 7.26        | 1.41  | Benzoic acid                       |
|                                      |       | Benzenecetic acid, methyl ester         | 7.33                   | 0.59  | Benzenecetic acid, methyl ester...      | 7.33        | 1.19  | Benzenecetic acid                  |
| 7.38                                 | 3.32  | 1-methyl-2-Octyl-Cyclopropane           | 7.38                   | 0.84  |                                         | 7.37        | 2.85  | 1-methyl-2-Octyl-Cyclopropane      |
|                                      |       | 2-methyl-Benzaldehyde                   |                        |       |                                         | 7.64        | 0.42  | Benzaldehyde, 2-methyl-            |
|                                      |       | 2-Coumaranone                           |                        |       |                                         | 7.83        | 0.55  | 2-Coumaranone                      |
|                                      |       | 1,2,3-Trimethoxybenzene                 | 8.32                   | 0.32  | 1,2,3-Trimethoxybenzene                 | 8.32        | 0.26  | 1,2,3-Trimethoxybenzene            |
|                                      |       | Heptanedioic acid, dimethyl ester       |                        |       |                                         | 8.51        | 0.22  | Heptanedioic acid, dimethyl ester  |
| 8.63                                 | 7.71  | Syringol                                | 8.63                   | 6.94  |                                         | 8.63        | 4.89  |                                    |
| 8.83                                 | 6.4   | 1-Tetradecene                           | 8.83                   | 4.18  |                                         | 8.83        | 5.18  |                                    |
|                                      |       | 3-(2-Hydroxyphenyl)propionic acid       |                        |       |                                         | 8.93        | 0.42  | 3-(2-Hydroxyphenyl)propionic acid  |
|                                      |       | Vanillin                                |                        |       |                                         | 9           | 0.97  |                                    |
| 9.58                                 | 0.63  | Acetovanillone                          | 9.58                   | 1.08  |                                         | 9.58        | 2.44  |                                    |
| 9.67                                 | 23.19 | 2,4-Di-tert-butylphenol                 | 9.68                   | 24.39 | Phenol, 2,4-bis(1,1-dimethylethyl)      | 9.67        | 21.71 | Phenol, 2,4-bis(1,1-dimethylethyl) |
| 9.79                                 | 0.57  | 2-tert-Butyl-4-(hydroxymethyl)-5        | 9.8                    | 0.48  |                                         |             |       |                                    |
|                                      |       | Nonanedioic acid, dimethyl ester        | 9.87                   | 0.77  | Nonanedioic acid, dimethyl ester        |             |       |                                    |
| 10.17                                | 9.03  | 1-Hexadecene                            | 10.17                  | 7.14  |                                         | 10.17       | 7.45  |                                    |
| 10.21                                | 0.32  | Tetradecane                             |                        |       |                                         | 10.21       | 0.12  | Tetradecane                        |
|                                      |       | Diethylaminothyl Chloride Hydrochloride | 10.56                  | 0.39  | Diethylaminothyl Chloride Hydrochloride |             |       |                                    |
| 10.66                                | 0.41  | Benzophenone                            | 10.66                  | 0.96  |                                         | 10.65       | 0.44  |                                    |
| 11.05                                | 0.47  | 1,2,3-trimethyl-4-p-Naphthalene,        | 11.06                  | 0.47  |                                         | 10.97       | 0.24  |                                    |
| 11.25                                | 0.34  | Methyl tetradecanoate                   | 11.26                  | 0.37  |                                         |             |       |                                    |
| 11.31                                | 0.55  | 1,1-Bis(p-tolyl)ethane                  | 11.31                  | 0.62  |                                         | 11.3        | 0.45  |                                    |
| 11.42                                | 0.36  | Sodium-2,6-Diisopropyl-naphthalene      | 11.43                  | 0.44  |                                         | 11.42       | 0.32  |                                    |
| 11.51                                | 0.64  | Acetosyringone                          | 11.51                  | 0.95  |                                         | 11.52       | 2.89  |                                    |
| 11.96                                | 7.26  | 1-Octadecene                            | 11.97                  | 7.74  |                                         | 11.95       | 6.07  |                                    |
| 13.05                                | 0.76  | Bi-1,2-Benzenedicarboxylic acid         | 13.06                  | 0.52  |                                         |             |       |                                    |
| 13.81                                | 8.56  | Hexadecanoic acid, methyl ester         | 13.83                  | 8.18  |                                         | 13.81       | 7.9   |                                    |
| 14.27                                | 7.56  | Methyl-3-(3,5-Ditertbutyl-4-hydroxy)    | 14.29                  | 10.55 |                                         | 14.26       | 5.27  |                                    |
| 14.62                                | 2.36  | Dibutyl phthalate                       | 14.64                  | 2.62  |                                         | 14.62       | 2.09  |                                    |
| 15.07                                | 4.53  | 1-Nonadecene                            | 15.08                  | 4.74  |                                         | 15.06       | 4.32  |                                    |
| 15.50                                | 2.24  | N-(2-(Diphenylphosphinyl)benzyl)        | 15.51                  | 1.62  |                                         | 15.5        | 1.4   |                                    |
| 17.82                                | 0.76  | 9-Octadecenoic acid (Z)-, methyl        | 17.83                  | 1.24  |                                         | 17.8        | 0.9   |                                    |
| 18.63                                | 4.91  | Octadecanoic acid, methyl ester         | 18.66                  | 5.94  |                                         | 18.63       | 5.39  |                                    |
| 21.06                                | 2.76  | 1-Chloro-hexadecane                     | 21.1                   | 2.02  |                                         | 21          | 2.19  |                                    |
| Total                                | 95.64 |                                         | Total                  | 96.1  |                                         | Total       | 89.95 |                                    |

Table S5. The phenolic compounds peak area percentage from GC-MS analysis for K<sub>2</sub>CO<sub>3</sub>-lignin depolymerization with Cu-Fe/Al<sub>2</sub>O<sub>3</sub>, Cu-Fe/SiO<sub>2</sub>, and without catalyst (microwave heating at 300 watts, 1% w/w of H<sub>2</sub>O<sub>2</sub> in NaOH solution for 30 min)

| Fe-Cu/Al <sub>2</sub> O <sub>3</sub> |       |                                   | Fe-Cu/SiO <sub>2</sub> |       |                                 | Without Catalyst |       |                               |
|--------------------------------------|-------|-----------------------------------|------------------------|-------|---------------------------------|------------------|-------|-------------------------------|
| RT                                   | %Area | Type                              | RT                     | %Area | Type                            | RT               | %Area | Type                          |
| 7.37                                 | 8.67  | Benzoic acid, ammonium salt       | 7.37                   | 9.09  | Benzoic acid, ammonium salt     | 7.37             | 4.13  | Benzoic acid, ammonium salt   |
| 7.43                                 | 2.65  | Dodecane                          | 7.43                   | 12.04 | Dodecane                        | 7.43             | 12.59 | Dodecane                      |
|                                      |       | Benzoic acid                      |                        |       |                                 | 7.56             | 21.59 | Benzoic acid                  |
|                                      |       | 2,6-Dimethylbenzaldehyde          | 7.69                   | 0.32  | 2,6-Dimethylbenzaldehyde        | 7.69             | 12.79 | 2,6-Dimethylbenzaldehyde      |
|                                      |       | 2-Coumaranone                     |                        |       |                                 | 7.83             | 1.09  | 2-Coumaranone                 |
| 7.92                                 | 1.3   | Benzeneacetic acid                | 7.92                   | 2.04  | Benzeneacetic acid              | 7.92             |       |                               |
|                                      |       | Acetic acid                       |                        |       |                                 | 8.01             | 6.19  | Acetic acid                   |
|                                      |       | Tridecane                         |                        |       |                                 | 8.18             | 0.78  | Tridecane                     |
| 8.32                                 | 0.28  | 1,2,3-Trimethoxybenzene           | 8.32                   |       |                                 | 8.32             | 0.6   | 1,2,3-Trimethoxybenzene       |
|                                      |       | 2-Methoxy-4-vinylphenol           | 8.38                   |       |                                 | 8.38             |       |                               |
|                                      |       | 1,3-Isobenzofurandione            |                        |       |                                 | 8.46             |       |                               |
| 8.54                                 | 0.33  | 1,2-Dimethyl-4-(dimethoxymethyl)  | 8.54                   |       |                                 | 8.54             |       |                               |
| 8.64                                 | 13.78 | Syringol                          | 8.64                   | 10.07 | Syringol                        | 8.64             | 5.14  | Syringol                      |
|                                      |       | 3-(2-Hydroxyphenyl)propionic acid |                        |       |                                 | 8.74             |       |                               |
| 8.83                                 | 5.03  | 1-Tetradecene                     | 8.83                   | 3.46  | 1-Tetradecene                   | 8.83             | 0.94  | 1-Tetradecene                 |
| 8.88                                 | 0.37  | 1,1'-Biphenyl                     | 8.88                   | 0.31  |                                 | 8.88             |       |                               |
| 9                                    | 0.45  | Vanillin                          | 9                      | 0.41  | Vanillin                        | 9                | 1.19  | Vanillin                      |
|                                      |       | 1-(4-hydroxyphenyl)-Ethanone      |                        |       |                                 | 9.27             | 1.05  | 1-(4-hydroxyphenyl)-Ethanone  |
|                                      |       |                                   |                        |       | Benzofuran                      | 9.33             |       |                               |
| 9.58                                 | 2.13  | Acetovanillone                    | 9.58                   | 1.6   | Acetovanillone                  | 9.58             | 5.27  | Acetovanillone                |
| 9.67                                 | 20.98 | 2,4-Di-tert-butylphenol           | 9.67                   | 20.02 | 2,4-Di-tert-butylphenol         | 9.67             | 2.76  | 2,4-Di-tert-butylphenol       |
|                                      |       | Dodecanoic acid, methyl ester     |                        |       |                                 | 9.7              | 0.38  | Dodecanoic acid, methyl ester |
| 9.79                                 | 0.62  | 2-tert-Butyl-4-(hydroxymethyl)    | 9.79                   | 0.54  | 2-tert-Butyl-4-(hydroxymethyl)  | 9.79             |       |                               |
| 10.17                                | 8.21  | 1-Hexadecene                      | 10.17                  | 4.55  | 1-Hexadecene                    | 10.17            | 1.35  | 1-Hexadecene                  |
| 10.21                                | 0.22  | Hexadecane                        | 10.21                  |       |                                 | 10.21            |       |                               |
| 10.65                                | 0.54  | Benzophenone                      | 10.65                  | 0.47  |                                 | 10.65            |       |                               |
| 10.84                                | 0.68  | Syringaldehyde                    | 10.84                  | 0.87  | Syringaldehyde                  | 10.84            | 0.65  | Syringaldehyde                |
| 11.05                                | 0.43  | 1,2,3-trimethyl-4-p-Naphthalene   | 11.05                  | 0.42  | 1,2,3-trimethyl-4-p-Naphthalene | 11.05            |       |                               |
| 11.3                                 | 0.31  | 5,6-dihydro-5,6-dimethylbenzol    | 11.3                   | 0.37  | 5,6-dihydro-5,6-dimethylbenzol  | 11.3             |       |                               |
| 11.42                                | 0.29  | 2,6-Diisopropyl-naphthalene       | 11.42                  | 0.26  | 2,6-Diisopropyl-naphthalene     | 11.42            |       |                               |
| 11.53                                | 4.71  | Acetosyringone                    | 11.53                  | 4.33  | Acetosyringone                  | 11.53            | 7.12  | Acetosyringone                |
| 11.95                                | 6.36  | Heptadecenal                      | 11.95                  | 3.18  | Heptadecenal                    | 11.95            | 0.97  | Heptadecenal                  |
|                                      |       | 4-hydroxy-3-Benzeneacetic acid    | 12.02                  | 0.41  | 4-hydroxy-3-Benzeneacetic acid  | 12.02            |       |                               |
| 13.04                                | 0.39  | Bi-1,2-Benzenedicarboxylic acid   | 13.04                  | 0.63  | Bi-1,2-Benzenedicarboxylic acid | 13.04            |       |                               |

## S15

| Fe-Cu/Al <sub>2</sub> O <sub>3</sub> |       |                                      | Fe-Cu/SiO <sub>2</sub> |       |                                      | Without Catalyst |       |                                      |
|--------------------------------------|-------|--------------------------------------|------------------------|-------|--------------------------------------|------------------|-------|--------------------------------------|
| RT                                   | %Area | Type                                 | RT                     | %Area | Type                                 | RT               | %Area | Type                                 |
| 13.8                                 | 2.53  | Hexadecanoic acid, methyl ester      | 13.8                   | 5.77  | Hexadecanoic acid, methyl ester      | 13.8             | 1.03  | Hexadecanoic acid, methyl ester      |
| 14.25                                | 2.07  | Methyl 3-(3,5-di-tert-butyl-4-hydro) | 14.25                  | 4.78  | Methyl 3-(3,5-di-tert-butyl-4-hydro) | 14.25            | 0.88  | Methyl 3-(3,5-di-tert-butyl-4-hydro) |
| 14.62                                | 2.26  | Dibutyl phthalate                    | 14.62                  | 1.83  | Dibutyl phthalate                    | 14.62            | 0.97  | Dibutyl phthalate                    |
| 15.06                                | 4.13  | 1-Octadecene                         | 15.06                  | 1.73  | 1-Octadecene                         | 15.06            | 0.7   | 1-Octadecene                         |
| 15.5                                 | 1.92  | N-(2-(Diphenylphosphinyl)benzyl)     | 15.5                   | 1.77  | N-(2-(Diphenylphosphinyl)benzyl)     | 15.5             | 0.56  | N-(2-(Diphenylphosphinyl)benzyl)     |
| 18.6                                 | 1.65  | Octadecanoic acid, methyl ester      | 18.6                   | 3.43  | Octadecanoic acid, methyl ester      | 18.6             | 0.65  | Octadecanoic acid, methyl ester      |
| 21.05                                | 2.06  | 1-chloro-Hexadecane                  | 21.05                  | 0.85  | 1-chloro-Hexadecane                  | 21.05            |       |                                      |
| Total                                | 95.35 |                                      | Total                  | 95.55 |                                      | Total            | 91.37 |                                      |

Table S6. The phenolic compounds concentration peak area from GC-MS analysis for NaOH-lignin depolymerization with Cu-Fe/Al<sub>2</sub>O<sub>3</sub>, Cu-Fe/SiO<sub>2</sub>, and without catalyst (microwave heating at 300 watts, 1% w/w of H<sub>2</sub>O<sub>2</sub> in NaOH solution for 15 min).

| Fe-Cu/Al <sub>2</sub> O <sub>3</sub> |       |                                    | Fe-Cu/SiO <sub>2</sub> |        |                                    | Without Catalyst |       |                                    |
|--------------------------------------|-------|------------------------------------|------------------------|--------|------------------------------------|------------------|-------|------------------------------------|
| RT                                   | %Area | Type                               | RT                     | %Area  | Type                               | RT               | %Area | Type                               |
| 7.27                                 | 1.09  | Benzoic acid                       |                        |        |                                    | 7.27             | 1.39  | Benzoic acid                       |
| 7.33                                 | 0.46  | Benzeneacetic acid, methyl ester   | 7.33                   | 4.08   | Benzeneacetic acid, methyl ester   | 7.33             |       |                                    |
| 7.37                                 | 2.87  | Benzoic acid, ammonium salt        |                        | 2.21   | Benzoic acid, ammonium salt        | 7.37             | 10.47 | Benzoic acid, ammonium salt        |
| 7.94                                 |       | Acetic acid                        | 7.94                   | 2.71   | Acetic acid                        | 7.94             | 2.79  | Acetic acid                        |
| 8.03                                 |       | 3-methoxy- 1,2-benzenediol         | 8.03                   | 1.15   | 3-methoxy- 1,2-benzenediol         | 8.03             |       |                                    |
|                                      |       | 7,7-dimethylbicyclo octane         |                        |        |                                    | 8.11             |       |                                    |
| 8.38                                 | 0.44  | 2-Methoxy-4-vinylphenol            | 8.38                   | 0.4    | 2-Methoxy-4-vinylphenol            | 8.38             | 0.32  | 2-Methoxy-4-vinylphenol            |
| 8.64                                 | 13.39 | Syringol                           | 8.64                   | 19.21  | Syringol                           | 8.64             | 5.86  | Syringol                           |
| 8.83                                 | 4.16  | 1-Tetradecene                      | 8.83                   | 2.77   | 1-Tetradecene                      | 8.83             | 3.24  | 1-Tetradecene                      |
| 9                                    | 1.39  | Vanillin                           | 9                      | 2.156  | Vanillin                           | 9                | 1     | Vanillin                           |
| 9.09                                 | 0.8   | 4-Tricyclo decanone                | 9.09                   | 1.1    | 4-Tricyclo decanone                | 9.09             |       |                                    |
|                                      |       | Octanedioic acid, dimethyl ester   |                        |        |                                    | 9.2              | 0.25  | Octanedioic acid, dimethyl ester   |
| 9.58                                 | 2.33  | Acetovanillone                     | 9.58                   | 3.69   | Acetovanillone                     | 9.58             | 2.84  | Acetovanillone                     |
| 9.67                                 | 20.17 | 2,4-Di-tert-butylphenol            | 9.67                   | 27.29  | 2,4-Di-tert-butylphenol            | 9.67             | 13.09 | 2,4-Di-tert-butylphenol            |
| 9.79                                 | 0.84  | 2-tert-Butyl-4-(hydroxymethyl)     | 9.79                   | 1.23   | 2-tert-Butyl-4-(hydroxymethyl)     | 9.79             |       | 2-tert-Butyl-4-(hydroxymethyl)     |
| 10.16                                | 6.53  | 1-Tetradecene                      | 10.16                  | 2.37   | 1-Tetradecene                      | 10.16            | 4.62  | 1-Tetradecene                      |
| 10.65                                | 0.49  | Benzophenone                       | 10.65                  | 0.71   | Benzophenone                       | 10.65            | 0.38  | Benzophenone                       |
| 10.84                                | 0.98  | Syringaldehyde                     | 10.84                  | 2.16   | Syringaldehyde                     | 10.84            | 0.77  | Syringaldehyde                     |
| 11.05                                | 0.47  | 1,3-diformyl-2-chloro-5-isopropyl  | 11.05                  | 0.48   | 1,3-diformyl-2-chloro-5-isopropyl  | 11.05            | 0.39  | 1,3-diformyl-2-chloro-5-isopropyl  |
| 11.3                                 | 0.45  | 1,2,3-trimethyl-4-p-Naphthalene    | 11.3                   | 0.74   | 1,2,3-trimethyl-4-p-Naphthalene    | 11.3             | 0.32  | 1,2,3-trimethyl-4-p-Naphthalene    |
| 11.42                                | 0.48  | 2,6-Diisopropyl naphthalene        | 11.42                  | 0.42   | 2,6-Diisopropyl naphthalene        | 11.42            | 0.24  | 2,6-Diisopropyl naphthalene        |
| 11.53                                | 4.72  | Acetosyringone                     | 11.53                  | 9.36   | Acetosyringone                     | 11.53            | 6.39  | Acetosyringone                     |
| 11.95                                | 5.47  | Heptadecenal                       | 11.95                  | 1.07   | Heptadecenal                       | 11.95            | 4.03  | Heptadecenal                       |
| 12.02                                | 0.68  | 4-hydroxy-3-benzeneacetic acid     | 12.02                  |        |                                    | 12.02            | 1.13  | 4-hydroxy-3-benzeneacetic acid     |
| 13.04                                | 0.54  | Bi-1,2-Benzenedicarboxylic acid    | 13.04                  |        |                                    | 13.04            | 0.35  | Bi-1,2-Benzenedicarboxylic acid    |
| 13.8                                 | 6.91  | Hexadecanoic acid, methyl ester    | 13.8                   | 2.77   | Hexadecanoic acid, methyl ester    | 13.8             | 5.44  | Hexadecanoic acid, methyl ester    |
| 14.26                                | 4.49  | Methyl-3-(3,5-ditertbutyl-4-hydro- | 14.26                  | 1.88   | Methyl-3-(3,5-ditertbutyl-4-hydro- | 14.26            | 4.79  | Methyl-3-(3,5-ditertbutyl-4-hydro- |
| 14.61                                | 1.81  | Dibutyl phthalate                  | 14.61                  | 2.45   | Dibutyl phthalate                  | 14.61            | 1.25  | Dibutyl phthalate                  |
| 15.05                                | 3     | 1,2-diethyl-cyclohexadecane        | 15.05                  |        |                                    | 15.05            | 2.47  | 1,2-diethyl-cyclohexadecane        |
| 15.48                                | 1.52  | N-(2-(Diphenylphosphinyl)benzyl)   | 15.48                  | 1.65   | N-(2-(Diphenylphosphinyl)benzyl)   | 15.48            | 1.24  | N-(2-(Diphenylphosphinyl)benzyl)   |
| 17.8                                 | 0.88  | 9-Octadecenoic acid, methyl ester  | 17.8                   | 1.79   | 9-Octadecenoic acid, methyl ester  | 17.8             | 0.75  | 9-Octadecenoic acid, methyl ester  |
| 18.62                                | 4.87  | Octadecanoic acid, methyl ester    | 18.62                  |        |                                    | 18.62            | 3.57  | Octadecanoic acid, methyl ester    |
| 20.51                                | 1.33  | Lauramide                          | 20.51                  |        |                                    | 20.51            | 0.75  | Lauramide                          |
| 21.03                                | 1.51  | Trifluoroacetic acid, n-heptadec   | 21.03                  |        |                                    | 21.03            | 1.37  | Trifluoroacetic acid, n-heptadec   |
| Total                                | 95.07 |                                    | Total                  | 95.846 |                                    | Total            | 81.5  |                                    |



Table S7. The phenolic compounds concentration peak area from GC-MS analysis for NaOH-lignin depolymerization with Cu-Fe/Al<sub>2</sub>O<sub>3</sub>, Cu-Fe/SiO<sub>2</sub>, and without catalyst (microwave heating at 300 watts, 1% w/w of H<sub>2</sub>O<sub>2</sub> in NaOH solution for 30 min).

| Fe-Cu/Al <sub>2</sub> O <sub>3</sub> |       |                                              | Fe-Cu/SiO <sub>2</sub> |       |                                           | Without Catalyst |        |                                              |
|--------------------------------------|-------|----------------------------------------------|------------------------|-------|-------------------------------------------|------------------|--------|----------------------------------------------|
| RT                                   | %Area | Type                                         | RT                     | %Area | Type                                      | RT               | %Area  | Type                                         |
| 7.33                                 | 2.92  | Benzoic acid                                 | 7.33                   | 14.24 | Benzoic acid                              | 7.33             | 34.42  | Benzoic acid                                 |
| 7.38                                 | 4.32  | Benzoic acid, ammonium salt                  | 7.38                   | 16.68 | Benzoic acid, ammonium salt               | 7.38             | 4.823  | Benzoic acid, ammonium salt                  |
| 7.42                                 | 10.16 | Tetradecane                                  |                        |       |                                           |                  |        |                                              |
| 7.9                                  | 1.08  | Benzeneacetic acid                           | 7.9                    | 2.25  | Benzeneacetic acid                        | 7.9              | 2.8    | Benzeneacetic acid                           |
|                                      |       | 4-ethyl-2-methoxy-phenol                     |                        |       |                                           | 8.12             | 0.55   | 4-ethyl-2-methoxy-phenol                     |
| 8.18                                 | 0.73  | Tridecane                                    |                        |       |                                           | 8.18             | 0.24   | Tridecane                                    |
|                                      |       | 1,2,3-Trimethoxybenzene                      |                        |       |                                           | 8.33             | 0.31   | 1,2,3-Trimethoxybenzene                      |
|                                      |       | 2-Methoxy-4-vinylphenol                      |                        |       |                                           | 8.38             | 0.42   | 2-Methoxy-4-vinylphenol                      |
|                                      |       | Phthalic anhydride                           |                        |       |                                           | 8.47             | 0.41   | Phthalic anhydride                           |
| 8.64                                 | 27.06 | Syringol                                     | 8.64                   | 13.52 | Syringol                                  | 8.64             | 10.34  | Syringol                                     |
|                                      |       | 4-hydroxy-benzaldehyde                       |                        |       |                                           | 8.75             | 0.5    | 4-hydroxy-benzaldehyde                       |
| 8.82                                 | 1.29  | 2-Tridecene                                  | 8.82                   | 0.76  | 2-Tridecene                               | 8.82             | 0.41   | 2-Tridecene                                  |
| 9                                    | 1.61  | Vanillin                                     | 9                      | 1.25  | Vanillin                                  | 9                | 1.35   | Vanillin                                     |
| 9.26                                 | 0.81  | 4,5-Dimethoxy-2-methylphenol                 | 9.26                   | 0.56  | 4,5-Dimethoxy-2-methylphenol              | 9.26             | 0.94   | 4,5-Dimethoxy-2-methylphenol                 |
|                                      |       | Benzofuran                                   |                        |       |                                           | 9.34             | 0.44   | Benzofuran                                   |
| 9.58                                 | 4.39  | Acetovanillone                               | 9.58                   | 2.74  | Acetovanillone                            | 9.58             | 4.7    | Acetovanillone                               |
| 9.66                                 | 2.78  | Phenol, 2,4-bis(1,1-dimethylethyl)           | 9.66                   | 2.29  | Phenol, 2,4-bis(1,1-dimethylethyl)        | 9.66             | 1.27   | Phenol, 2,4-bis(1,1-dimethylethyl)           |
| 9.69                                 | 1.13  | Undecanoic acid, 10-methyl-, methyl ester    | 9.69                   | 1.33  | Undecanoic acid, 10-methyl-, methyl ester | 9.69             | 0.55   | Undecanoic acid, 10-methyl-, methyl ester    |
| 9.79                                 | 1.58  | 2,4-Dimethyl-3-(methoxycarbonyl)             | 9.79                   | 0.81  | 2,4-Dimethyl-3-(methoxycarbonyl)          | 9.79             | 0.37   | 2,4-Dimethyl-3-(methoxycarbonyl)             |
|                                      |       | 2-tert-Butyl-4-(hydroxymethyl)-5-formylfuran |                        |       |                                           | 9.8              | 0.75   | 2-tert-Butyl-4-(hydroxymethyl)-5-formylfuran |
| 9.86                                 | 1.03  | Nonanedioic acid, dimethyl ester             | 9.86                   | 0.73  | Nonanedioic acid, dimethyl ester          | 9.86             | 0.72   |                                              |
|                                      |       | 2,6-Dimethyl-3-(methoxymethyl)               |                        |       |                                           | 10.07            | 0.27   | 2,6-Dimethyl-3-(methoxymethyl)-p...          |
| 10.16                                | 1.6   | 2-Tetradecene                                | 10.16                  | 1.05  | 2-Tetradecene                             | 10.16            | 0.74   | 2-Tetradecene                                |
| 10.84                                | 1.97  | Syringaldehyde                               | 10.84                  | 1.48  | Syringaldehyde                            | 10.84            | 0.79   | Syringaldehyde                               |
|                                      |       | 7,8-dimethylbenzocyclooctene                 |                        |       |                                           | 11.11            |        | 7,8-dimethylbenzocyclooctene                 |
| 11.24                                | 0.48  | Methyl tetradecanoate                        | 11.24                  | 0.78  | Methyl tetradecanoate                     | 11.24            |        |                                              |
| 11.54                                | 11.71 | Acetosyringone                               | 11.54                  | 7.56  | Acetosyringone                            | 11.54            | 10.28  | Acetosyringone                               |
| 11.94                                | 1.33  | 1-Nonadecene                                 | 11.94                  | 0.84  | 1-Nonadecene                              | 11.94            | 0.52   | 1-Nonadecene                                 |
| 12.02                                | 1.99  | 4-hydroxy-3-benzeneacetic acid               | 12.02                  | 1.58  | 4-hydroxy-3-benzeneacetic acid            | 12.02            | 1.23   | 4-hydroxy-3-benzeneacetic acid               |
|                                      |       | 1,3,5-Benzenetricarboxylic acid              | 12.6                   | 2.37  | 1,3,5-Benzenetricarboxylic acid           |                  |        |                                              |
| 13.79                                | 3.03  | Hexadecanoic acid, methyl ester              | 13.79                  | 5.99  | Hexadecanoic acid, methyl ester           | 13.79            | 1.18   | Hexadecanoic acid, methyl ester              |
| 14.23                                | 1.56  | Methyl 3-(3,5-di-tert-butyl-4-hydro          | 14.23                  | 1.8   | Methyl 3-(3,5-di-tert-butyl-4-hydro       | 14.23            | 0.49   | Methyl 3-(3,5-di-tert-butyl-4-hydro          |
|                                      |       | Hexadecanoic acid                            |                        |       |                                           | 14.44            | 0.32   | Hexadecanoic acid                            |
| 14.6                                 | 1.37  | Dibutyl phthalate                            | 14.6                   | 1.17  | Dibutyl phthalate                         | 14.6             | 0.58   | Dibutyl phthalate                            |
| 15.04                                |       | Ethyl-cyclododecane                          | 15.04                  | 0.69  | Ethyl-cyclododecane                       |                  |        |                                              |
| 17.81                                |       | 9-Octadecenoic acid, methyl ester            | 17.81                  | 1.08  | 9-Octadecenoic acid, methyl ester         |                  |        |                                              |
| 18.59                                | 1.73  | Octadecanoic acid, methyl ester              | 18.59                  | 2.4   | Octadecanoic acid, methyl ester           | 18.59            | 0.48   | Octadecanoic acid, methyl ester              |
| Total                                | 87.66 |                                              | Total                  | 85.95 |                                           | Total            | 83.193 |                                              |

Table S8. Recyclability study of CuFe/Al<sub>2</sub>O<sub>3</sub> and CuFe/SiO<sub>2</sub> catalysts on depolymerization of NaOH-lignin under microwave at 300W for 30 min.

| CuFe/Al <sub>2</sub> O <sub>3</sub> catalyst |                                     |                     |                                     |                     |                                     |                     |
|----------------------------------------------|-------------------------------------|---------------------|-------------------------------------|---------------------|-------------------------------------|---------------------|
| Products                                     | 1st reaction                        |                     | 2nd reaction                        |                     | 3rd reaction                        |                     |
|                                              | Concentration (mg L <sup>-1</sup> ) | Concentration (wt%) | Concentration (mg L <sup>-1</sup> ) | Concentration (wt%) | Concentration (mg L <sup>-1</sup> ) | Concentration (wt%) |
| S1 (Syringol)                                | 2.82                                | 4.50                | 5.25                                | 10.10               | 2.01                                | 5.19                |
| S2 (Syringaldehyde)                          | 38.46                               | 61.31               | 22.92                               | 44.11               | 14.75                               | 38.05               |
| S3 (Acetosyringone)                          | 9.46                                | 15.08               | 6.48                                | 12.46               | 11.36                               | 29.29               |
| G1 (Vanillin)                                | 4.98                                | 7.95                | 6.32                                | 12.17               | 6.81                                | 17.58               |
| G2 (Acetovanillone)                          | 4.11                                | 6.55                | 3.14                                | 6.05                | 3.83                                | 9.88                |
| H1 (2,4-Di-tert butylphenol)                 | 2.89                                | 4.61                | 7.84                                | 15.09               | 0.00                                | 0.00                |
| Total phenolic products                      | 62.73                               | 100.00              | 51.95                               | 100.00              | 38.76                               | 100.00              |
| CuFe/SiO <sub>2</sub> catalyst               |                                     |                     |                                     |                     |                                     |                     |
| Products                                     | 1st reaction                        |                     | 2nd reaction                        |                     | 3rd reaction                        |                     |
|                                              | Concentration (mg L <sup>-1</sup> ) | Concentration (wt%) | Concentration (mg L <sup>-1</sup> ) | Concentration (wt%) | Concentration (mg L <sup>-1</sup> ) | Concentration (wt%) |
| S1 (Syringol)                                | 2.26                                | 4.21                | 4.66                                | 12.47               | 2.70                                | 23.12               |
| S2 (Syringaldehyde)                          | 17.68                               | 32.95               | 21.17                               | 56.68               | 0.00                                | 0.00                |
| S3 (Acetosyringone)                          | 20.06                               | 37.37               | 3.81                                | 10.20               | 3.02                                | 25.81               |
| G1 (Vanillin)                                | 5.23                                | 9.74                | 4.88                                | 13.05               | 3.66                                | 31.28               |
| G2 (Acetovanillone)                          | 3.01                                | 5.62                | 2.84                                | 7.60                | 2.31                                | 19.78               |
| H1 (2,4-Di-tert butylphenol)                 | 5.42                                | 10.10               | 0.00                                | 0.00                | 0.00                                | 0.00                |
| Total phenolic products                      | 53.66                               | 100.00              | 37.35                               | 100.00              | 11.69                               | 100.00              |

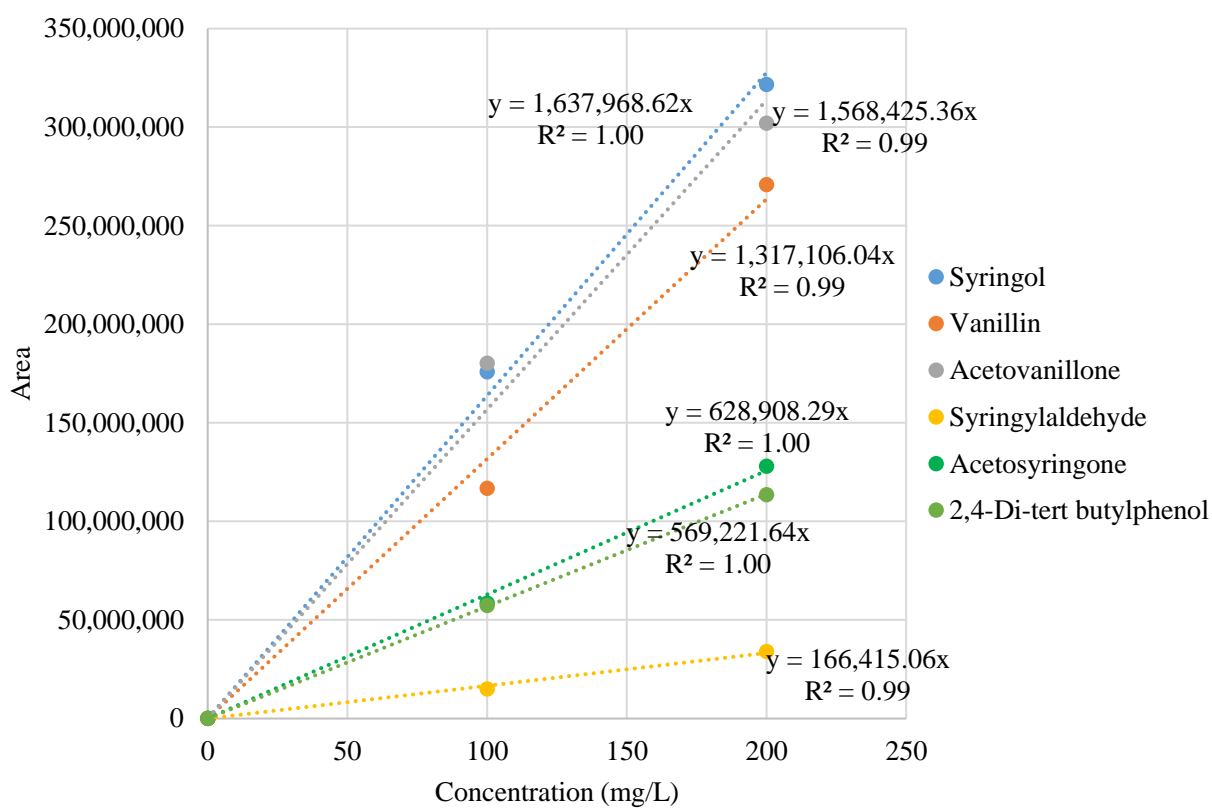

Figure S9 Standard curve from GC analysis of main products of lignin depolymerization for recyclability study.
